# Supplementary material
Source: Springer Nature journal article supplement (https://www.springermedizin.de/resource/supplementary/13256_2008_510_MOESM1_ESM.pdf/9646140)
Supplement: MOESM1 [file 9646140]

a

15/09/2006  
09:13:38

SCV: 4  
CVP: A1/1

C<sub>T</sub>: N E<sub>H</sub>: A1  
C<sub>E</sub>: 0

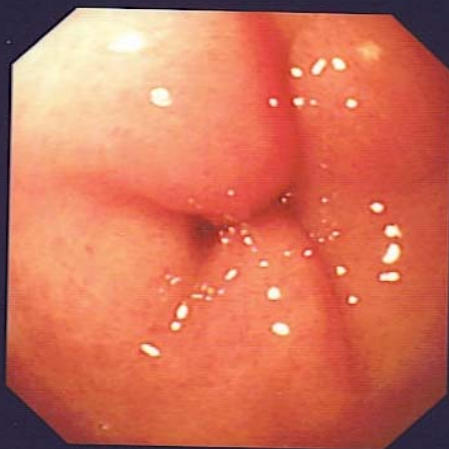

3/7q' ;a  
Comment:

b

15/09/2006  
09:17:10

SCV: 4  
CVP: B1/1

C<sub>T</sub>: N E<sub>H</sub>: A1  
C<sub>E</sub>: 0

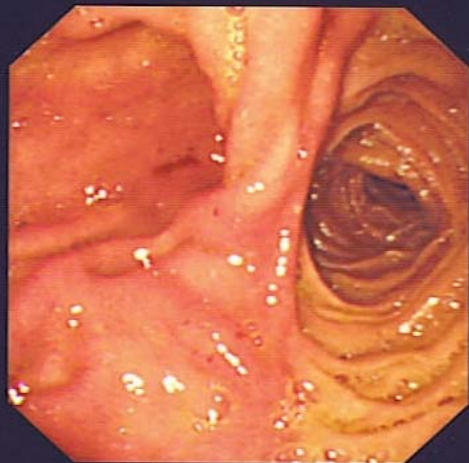

3/7q' ;a  
Comment:
